# Supplementary material for: QTL mapping and transcriptome analysis identify novel QTLs and candidate genes in Brassica villosa for quantitative resistance against Sclerotinia sclerotiorum
Source: PubMed Central journal article supplement (PMC10040396; doi:10.1007/s00122-023-04335-9), 2023-03-26
Supplement: 122_2023_4335_MOESM3_ESM.pdf [file 122_2023_4335_MOESM3_ESM.pdf]

**Table S1** Primer used for real-time quantitative PCR gene expression analysis.

| <b>Gene</b>       | <b>Forward [5' -&gt; 3']</b> | <b>Reverse [5' -&gt; 3']</b> | <b>bp</b> | <b>°C</b> | <b>Efficiency [%]</b> |
|-------------------|------------------------------|------------------------------|-----------|-----------|-----------------------|
| <i>BoI</i> ACT7   | TCTACAACGAGCTCCGTGTTG        | TGTGAGACACACCATCACCA         | 216       | 57        | 90                    |
| <i>BoI</i> PR1    | TCAGGTTGTTTGGAGAAAGTC        | CATTAGTAAGGCTTCTCGTTCACA     | 126       | 57        | 103                   |
| <i>BoI</i> ETR2   | CACTGCCATTGCACCTAGCTCTT      | CAACTCCATTGATCCCAATCTGC      | 200       | 59        | 103                   |
| <i>BoI</i> AOC3   | GCTTTCTTCTGGAAGTGGGGAAA      | GATCGCCCGTGTAGAGTTTGTTG      | 181       | 60        | 99                    |
| <i>BoI</i> LOX3   | GTGAGGAACAAGAACAAGGAG        | CGTTTTTGGATCAAGTTCGGTG       | 123       | 59        | 98                    |
| <i>BoI</i> NCED3  | ATGCTATTCTACGCCAGAGC         | TGGGCGATCATTGTGGATTC         | 212       | 57        | 85                    |
| <i>BoI</i> PDF1.2 | TCTTGTTCTTTTCGCTGCTTTTCG     | TGCAAGATCCATGTCGTGCTT        | 155       | 59        | 88                    |

**Table S2** Summary of the genetic map.

| Linkage group  | Marker       | Length [cM]  | Ø-Distance  | Max. gap [cM] |
|----------------|--------------|--------------|-------------|---------------|
| C01            | 121          | 75.4         | 0.63        | 7.8           |
| C02            | 122          | 90.4         | 0.75        | 16.2          |
| C03            | 233          | 129.9        | 0.56        | 7.9           |
| C04a           | 29           | 20.5         | 0.73        | 3.2           |
| C04b           | 36           | 27.1         | 0.77        | 2.6           |
| C05            | 131          | 101.5        | 0.78        | 7.1           |
| C06            | 131          | 72.7         | 0.56        | 5.1           |
| C07            | 142          | 80.5         | 0.57        | 6.4           |
| C08            | 139          | 74.6         | 0.54        | 6.1           |
| C09            | 34           | 112.3        | 3.4         | 44.2          |
| <b>Overall</b> | <b>1,118</b> | <b>784.9</b> | <b>0.71</b> | <b>44.2</b>   |

cM = centiMorgan

**Table S3** Sequencing output and mapping rates for RNAseq samples of *B. villosa* (BRA1896) and *B. oleracea* (BRA1909).

| Genotype       | Treatment  | Biological replicate | Clean reads [total] | <i>B. oleracea</i> * Alignment rate [%] | Clean reads [not mapped to <i>B. oleracea</i> ] | <i>S. sclerotiorum</i> ** Alignment rate [%] |
|----------------|------------|----------------------|---------------------|-----------------------------------------|-------------------------------------------------|----------------------------------------------|
| BRA1896        | Mock       | 1                    | 22,866,130          | 88.25                                   | 1,414,757                                       | 0                                            |
| BRA1896        | Mock       | 2                    | 21,050,845          | 88.92                                   | 1,301,601                                       | 0                                            |
| BRA1896        | Mock       | 3                    | 25,573,066          | 87.44                                   | 1,901,776                                       | 0.01                                         |
| BRA1896        | Inoculated | 1                    | 22,565,021          | 72.78                                   | 5,108,097                                       | 54.01                                        |
| BRA1896        | Inoculated | 2                    | 22,149,802          | 73.08                                   | 5,048,949                                       | 54.81                                        |
| BRA1896        | Inoculated | 3                    | 25,939,069          | 77.91                                   | 4,466,173                                       | 48.8                                         |
| BRA1909        | Mock       | 1                    | 23,136,015          | 93.33                                   | 884,824                                         | 0.01                                         |
| BRA1909        | Mock       | 2                    | 23,683,503          | 93.7                                    | 829,284                                         | 0                                            |
| BRA1909        | Mock       | 3                    | 23,970,811          | 93.9                                    | 757,613                                         | 0.09                                         |
| BRA1909        | Inoculated | 1                    | 23,998,749          | 74.96                                   | 5,465,232                                       | 64.92                                        |
| BRA1909        | Inoculated | 2                    | 26,671,157          | 83.28                                   | 3,762,007                                       | 57.08                                        |
| BRA1909        | Inoculated | 3                    | 23,996,940          | 74.87                                   | 5,476,408                                       | 65.56                                        |
| <b>Overall</b> |            |                      | <b>285,601,108</b>  | <b>83.54</b>                            | <b>36,416,721</b>                               | <b>28.77</b>                                 |

\* TO1000 reference genome (Parkin et al. 2014), \*\* Strain 1980 (Amselem et al. 2011).

**Table S4** Specifically expressed genes involved in the immune response of *B. villosa*.

| Gene_ID                  | Log <sub>2</sub> -fold change |         | Homolog in<br><i>A. thaliana</i> | Putative gene  |
|--------------------------|-------------------------------|---------|----------------------------------|----------------|
|                          | BRA1896                       | BRA1909 |                                  |                |
| Unigene.14971            | <b>1.18</b>                   | -0.91   | AT3G55560                        | <i>AHL15</i>   |
| Unigene.21095            | <b>1.87</b>                   | 0.29    | AT1G44830                        | <i>ERF014</i>  |
| Unigene.25806            | <b>2.50</b>                   | 0.16    | AT5G47220                        | <i>ERF2</i>    |
| Unigene.8766             | <b>-1.24</b>                  | -0.89   | AT2G37630                        | <i>MYB91</i>   |
| Unigene.26057            | <b>1.09</b>                   | 0.66    | AT3G25882                        | <i>NIMIN-2</i> |
| Unigene.38612            | <b>-1.49</b>                  | 0.24    | AT1G09770                        | <i>CDC5</i>    |
| Unigene.27241            | <b>0.99</b>                   | -0.01   | AT4G23570                        | <i>SGT1A</i>   |
| Unigene.30096            | <b>0.93</b>                   | 0.36    | AT3G55560                        | <i>AHL15</i>   |
| Unigene.2328             | <b>1.37</b>                   | 0.28    | AT1G61380                        | <i>SD1-29</i>  |
| Unigene.33382            | <b>1.47</b>                   | 0.52    | AT5G47220                        | <i>ERF2</i>    |
| Bo4g178190               | <b>1.15</b>                   | -0.36   | AT2G32680                        | <i>RLP23</i>   |
| Unigene.3661             | <b>1.36</b>                   | 0.50    | AT5G03320                        | <i>PCRK2</i>   |
| Unigene.22253            | <b>1.09</b>                   | 0.07    | AT3G55560                        | <i>AHL15</i>   |
| Unigene.7177             | <b>0.61</b>                   | -0.32   | AT5G66850                        | <i>MAPKKK5</i> |
| Unigene.19597            | <b>0.59</b>                   | 0.36    | AT3G21650                        | <i>PP2A</i>    |
| Unigene.29657            | <b>1.08</b>                   | 0.47    | AT3G49120                        | <i>PRX34</i>   |
| Unigene.32122            | <b>1.40</b>                   | 0.20    | AT5G24090                        | <i>CHIA</i>    |
| Unigene.13474            | <b>0.91</b>                   | 0.44    | AT2G39660                        | <i>BIK1</i>    |
| Trinity_DN2466_c0_g1_i7  | <b>1.40</b>                   | 0.00    | AT3G05360                        | <i>RLP30</i>   |
| Trinity_DN1154_c0_g1_i11 | <b>3.06</b>                   | 0.00    | AT1G61380                        | <i>SD1-29</i>  |
| Trinity_DN624_c0_g1_i2   | <b>1.24</b>                   | 0.00    | AT5G03320                        | <i>PCRK2</i>   |
| Trinity_DN787_c0_g3_i1   | <b>4.25</b>                   | 0.00    | AT2G32680                        | <i>RLP23</i>   |
| Trinity_DN1154_c0_g1_i51 | <b>1.92</b>                   | 0.00    | AT1G61380                        | <i>SD1-29</i>  |
| Trinity_DN787_c0_g3_i2   | <b>2.24</b>                   | 0.00    | AT2G32680                        | <i>RLP23</i>   |
| Trinity_DN1795_c0_g2_i9  | <b>1.61</b>                   | 0.00    | AT3G09980                        | <i>ACIP1</i>   |

Significant log<sub>2</sub>-fold changes are marked in bold (P adj. ≤ 0.05). Genes with a 'Trinity\_' prefix were assembled without the reference genome.

**Table S5** Ethylene-associated genes (iDEGs) with a significant difference in their expression between *B. villosa* (BRA1896) and *B. oleracea* (BRA1909).

| Gene_ID                 | Log <sub>2</sub> -fold change |              | Homolog<br>in<br><i>A. thaliana</i> | Putative annotation                  |
|-------------------------|-------------------------------|--------------|-------------------------------------|--------------------------------------|
|                         | BRA1896                       | BRA1909      |                                     |                                      |
| Unigene.22432           | <b>3.05</b>                   | 0.81         | AT3G59900                           | Auxin-regulated gene                 |
| Unigene.11755           | <b>0.93</b>                   | -0.19        | AT1G25560                           | Ethylene response DNA binding factor |
| Unigene.7022            | <b>2.31</b>                   | 0.35         | AT5G61600                           | Ethylene response factor             |
| Unigene.5240            | <b>1.63</b>                   | 0.15         | AT1G70000                           | Myb-like domain transcription factor |
| Unigene.4348            | -0.11                         | <b>3.16</b>  | AT5G21960                           | Ethylene response factor             |
| Unigene.24909           | <b>6.10</b>                   | <b>2.82</b>  | AT3G23220                           | Ethylene response factor             |
| Unigene.21095           | <b>1.87</b>                   | 0.29         | AT1G44830                           | Ethylene response factor             |
| Unigene.17191           | <b>1.92</b>                   | 0.18         | AT1G04310                           | Ethylene receptor                    |
| Unigene.25451           | -0.12                         | <b>0.74</b>  | AT5G67190                           | ERF/AP2 transcription factor         |
| Unigene.2465            | <b>2.19</b>                   | 0.33         | AT3G23150                           | Ethylene response factor             |
| Unigene.11883           | <b>3.46</b>                   | <b>1.77</b>  | AT1G28370                           | Ethylene response factor             |
| Unigene.5840            | <b>1.12</b>                   | <b>2.60</b>  | AT4G02380                           | Senescence-associated gene           |
| Unigene.24908           | <b>4.28</b>                   | <b>2.05</b>  | AT3G23230                           | Ethylene response factor             |
| Unigene.18643           | <b>0.90</b>                   | <b>-0.63</b> | AT1G25560                           | Ethylene response DNA binding factor |
| Unigene.2457            | <b>3.55</b>                   | 0.40         | AT3G23240                           | Ethylene response factor             |
| Unigene.8085            | -0.59                         | <b>-1.89</b> | AT5G59780                           | Myb domain protein                   |
| Unigene.24569           | 0.01                          | 0.08         | AT2G15900                           | Sorting nexin                        |
| Unigene.25806           | <b>2.50</b>                   | 0.16         | AT5G47220                           | Ethylene response factor             |
| Unigene.17161           | <b>1.78</b>                   | -0.93        | AT5G44210                           | Ethylene response factor             |
| Unigene.21970           | <b>1.08</b>                   | 0.10         | AT5G37260                           | Myb transcription factor             |
| Unigene.12944           | <b>1.29</b>                   | -0.03        | AT2G40940                           | Ethylene response sensor             |
| Unigene.33210           | <b>3.68</b>                   | <b>1.80</b>  | AT5G43410                           | Ethylene response factor             |
| Trinity_DN1607_c1_g6_i1 | <b>3.30</b>                   | -2.70        | AT2G44840                           | Ethylene response factor             |

Significant log<sub>2</sub>-fold change is marked in bold (P adj. ≤ 0.05).
